# Supplementary material for: A Post-Synaptic Scaffold at the Origin of the Animal Kingdom
Source: PubMed Central journal article supplement (PMC1876816; doi:10.1371/journal.pone.0000506), 2007-06-06
Supplement: pone.0000506.s003.pdf [file pone.0000506.s003.pdf]

G. A. V. I  
 F. Y. W  
 C. M  
 S. T  
 K. E. H  
 D. E. N. Q  
 P

```

rat      LG EED I P EP R I V I R H - G S T G L G F N I I G G E D G E G I F I S F I L A G G P A D L S G E L R G D Q I L S V N G V D L R N A S E Q A A I A L L N A G Q T V T I I A Q Y P P E E Y S R F E A 101
sponge  P A D K E L I D K P I I I T L S H P E G V G L G F N I I G G E E V G I F I S V I S K E G V A A D N G Q L V G D M I L E V N G Q N L E T W S E T A A A Q A L L T A G E T V T L K W V Y P D E F E E F Y R 102
cnidarian PED D D F T EE K V V L H H - G N T G L G F N I V G G E E N E G I F I S F I L A G G V A D L S G E L R G D Q I K A V N D V D L T N A T E Q A A A A L L G A G S T V T I T A Q Y P P E E Y N Q F E T 101
sea urchin Q N D D G I P EP Q W V I N H - G A T G L G F N I V G G E D G E G I F I S F I L A G G V A D L S G A L R G D Q I L A V N S K D L V N A T E D A A L A L L G A G Q V V T I D A Q Y P P E E Y N C F E A 101
worm     Q A P I A I P L EP P W Q L V H - G Q N G L G F N I V G G E D N E P I Y I S F V L P G G V A D L S G N V T G D V L L E V N G V V L R N A T K E A A A E A L L N A G N P W Y L T L Q Y P Q E Y Q I F E S 101
mosquito L P F S L R F VP T I V I R H - G A S G L G F N I V G G E D G Q G I F V S Y V L A G G A A D L G G E L R G D Q L L S V N G I S L A N A S E D A A A Q A L L N A G G T V T I L V Q Y P P E D Y N R F E Q 101
fish     L G D D E I T EP K I V L H H - G T T G L G F N I V G G E D G E G I F I S F I L A G G P A D L G E L R G D R I V S V N G V D L R S A T E Q A A A A L L N A G Q T V T I I A Q Y P P E E Y S R F E A 101
fly      V S T E D I T EP T I T I Q H - G P Q G L G F N I V G G E D G Q G I Y V S F I L A G G P A D L G S E L R G D Q L L S V N N V N L T H A T E E A A A Q A L L T S G G V V T I L L A Q Y P P E E Y N R F E A 101

```
