# Supplementary material for: A Post-Synaptic Scaffold at the Origin of the Animal Kingdom
Source: PubMed Central journal article supplement (PMC1876816; doi:10.1371/journal.pone.0000506), 2007-06-06
Supplement: pone.0000506.s007.pdf [file pone.0000506.s007.pdf]

**Table S1.1. NOS family.**

| Abbreviation      | gi       | Swissprot Locus | Description                                                             |
|-------------------|----------|-----------------|-------------------------------------------------------------------------|
| At NADPH-like     | 7269302  | N.A.            | NADPH-ferrihemoprotein reductase ATR1                                   |
| Os NADPH-like     | 50942815 | N.A.            | putative cytochrome P450 reductase                                      |
| Dicty NADPH-like  | 66799961 | N.A.            | sulfite reductase (NADPH)                                               |
| Yeast NADPH-like  | 730126   | NCPR_YEAST      | NADPH--cytochrome P450 reductase (CPR) (P450R)                          |
| Sponge NOS-like   | N.A.     | N.A.            | N.A.                                                                    |
| Sponge NADPH-like | N.A.     | N.A.            | N.A.                                                                    |
| Fly NOS           | 26006989 | NOS_DROME       | CG6713 Nitric-oxide synthase (dNOS)                                     |
| Fly NADPH         | 12643739 | NCPR_DROME      | CG11567 NADPH--cytochrome P450 reductase (CPR) (P450R)                  |
| Human nNOS        | 1709333  | NOS1_HUMAN      | Nitric-oxide synthase, brain (NOS type I) (Neuronal NOS) (N-NOS) (nNOS) |
| Human eNOS        | 266648   | NOS3_HUMAN      | Nitric-oxide synthase, endothelial (Endothelial NOS) (eNOS)             |
| Human iNOS        | 1352513  | NOS2A_HUMAN     | Nitric oxide synthase, inducible (Inducible NOS) (iNOS)                 |
| Human NADPH       | 2851393  | NCPR_HUMAN      | NADPH--cytochrome P450 reductase (CPR) (P450R)                          |

**Table S1.2. PMCA family.**

| Abbreviation     | gi       | Swissprot Locus | Description                                                   |
|------------------|----------|-----------------|---------------------------------------------------------------|
| At PMCA-like     | 12643246 | ACA8_ARATH      | Putative calcium-transporting ATPase 11, plasma membrane-type |
| Os PMCA-like     | 75322378 | ACA6_ORYSA      | Probable calcium-transporting ATPase 6, plasma membrane-type  |
| Dicty PMCA-like  | 1703456  | ATC1_DICDI      | Probable calcium-transporting ATPase PAT1                     |
| Yeast PMCA-like  | 728904   | ATC2_YEAST      | Calcium-transporting ATPase 2 (Vacuolar Ca(2+)-ATPase)        |
| Sponge PMCA-like | N.A.     | N.A.            | N.A.                                                          |
| Fly PMCA         | 62473111 | N.A.            | CG2165                                                        |
| Human PMCA1      | 14286104 | AT2B1_HUMAN     | Plasma membrane calcium-transporting ATPase 1 (PMCA1)         |
| Human PMCA2      | 14286115 | AT2B2_HUMAN     | Plasma membrane calcium-transporting ATPase 2 (PMCA2)         |
| Human PMCA3      | 14286116 | AT2B3_HUMAN     | Plasma membrane calcium-transporting ATPase 3 (PMCA3)         |
| Human PMCA4      | 14286105 | AT2B4_HUMAN     | Plasma membrane calcium-transporting ATPase 4 (PMCA4)         |

**Table S1.3. CaMKII and CASK families.**

| Abbreviation       | gi       | Swissprot Locus | Description                                                                      |
|--------------------|----------|-----------------|----------------------------------------------------------------------------------|
| At CaMK-like       | 12322336 | N.A.            | calcium-dependent protein kinase                                                 |
| Os CaMK-like       | 50355719 | N.A.            | putative calcium-dependent protein kinase                                        |
| Dicty CaMK-like    | 1730055  | MYLK_DICDI      | Myosin light chain kinase (MLCK)                                                 |
| Yeast CaMK-like    | 2507190  | KCC2_YEAST      | Calcium/calmodulin-dependent protein kinase II                                   |
| Sponge CaMKI-like  | N.A.     | N.A.            | N.A.                                                                             |
| Sponge CaMKII-like | N.A.     | N.A.            | N.A.                                                                             |
| CN CASK-like       | N.A.     | N.A.            | N.A.                                                                             |
| Fly CaMKII         | 46576378 | KCC2A_DROME     | CG18069 Calcium/calmodulin-dependent protein kinase type II alpha chain          |
| Fly CaMKI          | 3893099  | N.A.            | CG1495 Calcium/calmodulin dependent protein kinase I                             |
| Fly CaMGUK         | 34223738 | CAKI_DROME      | CG6703 Calcium/calmodulin-dependent protein kinase (CaMGUK)                      |
| Human CaMKII alpha | 20177970 | KCC2A_HUMAN     | Calcium/calmodulin-dependent protein kinase type II alpha chain                  |
| Human CaMKII beta  | 12643413 | KCC2B_HUMAN     | Calcium/calmodulin-dependent protein kinase type II beta chain                   |
| Human CaMKII delta | 12643414 | KCC2D_HUMAN     | Calcium/calmodulin-dependent protein kinase type II delta chain                  |
| Human CaMKII gamma | 62512173 | KCC2G_HUMAN     | Calcium/calmodulin-dependent protein kinase type II gamma chain                  |
| Human CaMKI alpha  | 3122301  | KCC1A_HUMAN     | Calcium/calmodulin-dependent protein kinase type I (CaM-KI) (CaM kinase I alpha) |
| Human CaMKI beta   | 67466915 | KCC1B_HUMAN     | Calcium/calmodulin-dependent protein kinase type 1B(CaM kinase I beta)           |
| Human CaMKI delta  | 56404610 | KCC1D_HUMAN     | Calcium/calmodulin-dependent protein kinase type 1D (CaM kinase I delta)         |
| Human CaMKI gamma  | 73620970 | KCC1G_HUMAN     | Calcium/calmodulin-dependent protein kinase type 1G (CaM kinase I gamma)         |
| Human CASK         | 27735175 | CSKP_HUMAN      | Peripheral plasma membrane protein CASK (hCASK)                                  |

**Table S1.4. IP3R family.**

| Abbreviation     | gi       | Swissprot Locus | Description                                                                                 |
|------------------|----------|-----------------|---------------------------------------------------------------------------------------------|
| Sponge IP3R-like | N.A.     | N.A.            | N.A.                                                                                        |
| Sponge RYR-like  | N.A.     | N.A.            | N.A.                                                                                        |
| Fly IP3R         | 44888998 | ITPR_DROME      | CG1063 Inositol 1,4,5-trisphosphate receptor (InsP3 receptor) (InsP3R)                      |
| Fly RYR          | 456984   | RY4_DROME       | CG10844 ryanodine receptor, calcium release channel                                         |
| Human IP3R1      | 17366467 | ITPR1_HUMAN     | Inositol 1,4,5-trisphosphate receptor type 1 (Type 1 inositol 1,4,5-trisphosphate receptor) |
| Human IP3R2      | 2833252  | ITPR2_HUMAN     | Inositol 1,4,5-trisphosphate receptor type 2 (Type 2 inositol 1,4,5-trisphosphate receptor) |
| Human IP3R3      | 17366458 | ITPR3_HUMAN     | Inositol 1,4,5-trisphosphate receptor type 3 (Type 3 inositol 1,4,5-trisphosphate receptor) |
| Human RYR1       | 19857096 | RYR1_HUMAN      | Ryanodine receptor 1 (Skeletal muscle-type ryanodine receptor) (RyR1) (RyR-1)               |
| Human RYR2       | 17380312 | RYR2_HUMAN      | Ryanodine receptor 2 (Cardiac muscle-type ryanodine receptor) (RyR2) (RyR-2)                |
| Human RYR3       | 18202506 | RYR3_HUMAN      | Ryanodine receptor 3 (Brain-type ryanodine receptor) (RyR3) (RyR-3)                         |

**Table S1.5. Delta Catenin and Beta Catenin families.**

| Abbreviation                   | gi        | Swissprot Locus | Description                                                                     |
|--------------------------------|-----------|-----------------|---------------------------------------------------------------------------------|
| At ARMC6-like                  | 111074180 | N.A.            | At4g33945                                                                       |
| Os ARMC6-like                  | 50913021  | N.A.            | armadillo/beta-catenin repeat protein-like                                      |
| Dicty ARMC6-like               | 10444518  | N.A.            | Aardvark                                                                        |
| Sponge p120/Delta Catenin-like | N.A.      | N.A.            | N.A.                                                                            |
| Sponge Beta Catenin-like       | N.A.      | N.A.            | N.A.                                                                            |
| Fly Beta Catenin               | 114162    | ARM_DROME       | CG11579 Armadillo segment polarity protein                                      |
| Fly Delta Catenin              | 6959880   | N.A.            | CG17484 Adherens junction protein p120                                          |
| Fly ARMC6                      | 19922518  | N.A.            | CG5721                                                                          |
| Human p120 Catenin             | 14916543  | CTND1_HUMAN     | Catenin delta-1 (p120 catenin) (p120(ctn)) (Cadherin-associated Src substrate)  |
| Human Delta Catenin            | 84028193  | CTND2_HUMAN     | Catenin delta-2 (Delta-catenin) (Neural plakophilin-related ARM-repeat protein) |
| Human Plakophilin1             | 20138951  | PKP1_HUMAN      | Plakophilin-1 (Band-6 protein) (B6P)                                            |
| Human Plakophilin2             | 20139105  | PKP2_HUMAN      | Plakophilin-2                                                                   |
| Human Plakophilin3             | 20139301  | PKP3_HUMAN      | Plakophilin-3                                                                   |
| Human p0071                    | 20139104  | PKP4_HUMAN      | Plakophilin-4 (p0071)                                                           |
| Human ARVC                     | 12229553  | ARVC_HUMAN      | Armadillo repeat protein deleted in velo-cardio-facial syndrome                 |
| Human Beta Catenin             | 461854    | CTNB1_HUMAN     | Beta-catenin                                                                    |

|             |           |             |                                                        |
|-------------|-----------|-------------|--------------------------------------------------------|
| Human PLAK  | 130257    | PLAK_HUMAN  | Junction plakoglobin (Desmoplakin-3) (Desmoplakin III) |
| Human ARMC6 | 109940304 | ARMC6_HUMAN | Armadillo repeat-containing protein 6                  |

**Table S1.6. GKAP family.**

| Abbreviation     | gi       | Swissprot Locus | Description                                                  |
|------------------|----------|-----------------|--------------------------------------------------------------|
| Sponge GKAP/DLG7 | N.A.     | N.A.            | N.A.                                                         |
| CN GKAP-like     | N.A.     | N.A.            | N.A.                                                         |
| CN DLG7-like     | N.A.     | N.A.            | N.A.                                                         |
| Fly vulcan       | 24585883 | N.A.            | CG8390 vulcan                                                |
| Fly mars         | 20129953 | N.A.            | CG17064 mars                                                 |
| Human GKAP1      | 18201963 | DLGP1_HUMAN     | Disks large-associated protein 1 (DAP-1) (hGKAP)             |
| Human GKAP2      | 71153507 | DLGP2_HUMAN     | Disks large-associated protein 2 (DAP-2)(SAPAP2)             |
| Human GKAP3      | 71153509 | DLGP3_HUMAN     | Disks large-associated protein 3 (DAP-3) (SAPAP3)            |
| Human GKAP4      | 18203629 | DLGP4_HUMAN     | Disks large-associated protein 4 (DAP-4) (SAPAP4)            |
| Human DLG7       | 82592583 | DLG7_HUMAN      | Discs large homolog 7 (Hepatoma up-regulated protein) (HURP) |

**Table S1.7. SynGAP family.**

| Abbreviation              | gi       | Swissprot Locus | Description                                    |
|---------------------------|----------|-----------------|------------------------------------------------|
| Dicty GAP-like            | 66816789 | N.A.            | NGAP-like protein                              |
| Yeast GAP-like            | 543907   | BUD2_YEAST      | Inhibitory regulator protein BUD2/CLA2         |
| Sponge GAP1               | N.A.     | N.A.            | N.A.                                           |
| Sponge SynGAP-like (GAP2) | N.A.     | N.A.            | N.A.                                           |
| Sponge GAP3               | N.A.     | N.A.            | N.A.                                           |
| Fly GAP1                  | 68067650 | GAP1_DROME      | CG6721 GTPase-activating protein               |
| Fly SynGAP-like (GAP2)    | 33112300 | GAP2_DROME      | CG32560 Probable Ras GTPase-activating protein |
| Fly GAP3                  | 4107166  | N.A.            | CG9209 vacuolar peduncle                       |
| Human SynGAP              | 34098679 | SYGP1_HUMAN     | Ras GTPase-activating protein SynGAP           |
| Human NGAP                | 13959419 | NGAP_HUMAN      | Ras GTPase-activating protein nGAP             |
| Human RasP21-1            | 4506431  | N.A.            | RAS p21 protein activator 1 isoform 1          |
| Human RasP21-2            | 12545408 | N.A.            | RAS p21 protein activator 2                    |
| Human RasP21-3            | 38201692 | N.A.            | RAS p21 protein activator 3                    |
| Human RasP21-4            | 31745138 | N.A.            | RAS p21 protein activator 4                    |

**Table S1.8. Cript family.**

| Abbreviation      | gi       | Swissprot Locus | Description                         |
|-------------------|----------|-----------------|-------------------------------------|
| At Cript-like     | 15220607 | N.A.            | unknown protein                     |
| Os Cript-like     | 50941887 | N.A.            | putative postsynaptic protein CRIPT |
| Sponge Cript-like | N.A.     | N.A.            | N.A.                                |
| Fly Cript         | 7297565  | N.A.            | CG4537                              |
| Human Cript       | 7661798  | N.A.            | postsynaptic protein CRIPT          |

**Table S1.9. Homer family.**

| Abbreviation      | gi       | Swissprot Locus | Description                           |
|-------------------|----------|-----------------|---------------------------------------|
| Dicty VASP-like   | 66804927 | N.A.            | vasodilator-stimulated phosphoprotein |
| Sponge Homer-like | N.A.     | N.A.            | N.A.                                  |
| Fly Homer         | 3834623  | N.A.            | CG11324 homer                         |
| Fly Enabled       | 24655476 | N.A.            | CG15112 enabled                       |
| Human Homer1      | 38604765 | HOME1_HUMAN     | Homer protein homolog 1               |
| Human Homer2      | 38605067 | HOME2_HUMAN     | Homer protein homolog 2               |
| Human Homer3      | 38605068 | HOME3_HUMAN     | Homer protein homolog 3               |
| Human Enabled     | 48428086 | ENAH_HUMAN      | Protein enabled homolog               |
| Human VASP        | 1718079  | VASP_HUMAN      | Vasodilator-stimulated phosphoprotein |

**Table S1.10. SPAR family.**

| Abbreviation        | gi       | Swissprot Locus | Description                                              |
|---------------------|----------|-----------------|----------------------------------------------------------|
| Dicty RapGAP-like   | 66802848 | N.A.            | hypothetical protein DDB0183944                          |
| Sponge SPAR-like    | N.A.     | N.A.            | N.A.                                                     |
| Sponge Rap1GAP-like | N.A.     | N.A.            | N.A.                                                     |
| Fly Rap1GAP         | 2655096  | N.A.            | CG33529 Rappap1                                          |
| Human S11L1 (SPAR)  | 50401319 | S11L1_HUMAN     | Signal-induced proliferation-associated 1-like protein 1 |
| Human S11L2         | 85681894 | S11L2_HUMAN     | Signal-induced proliferation-associated 1-like protein 2 |
| Human S11L3         | 50401326 | S11L3_HUMAN     | Signal-induced proliferation-associated 1-like protein 3 |
| Human Rap1GAP1      | 1350590  | RGP2_HUMAN      | Rap1 GTPase-activating protein 1 (Rap1GAP)               |
| Human Rap1GAP2      | 51869679 | N.A.            | Rap1 GTPase activating protein 2a                        |

**Table S1.11. Cortactin family.**

| Abbreviation             | gi       | Swissprot Locus | Description                                        |
|--------------------------|----------|-----------------|----------------------------------------------------|
| Dicty SH3_Cortactin-like | 28828733 | N.A.            | hypothetical protein                               |
| Yeast ABP1               | 113000   | ABP1_YEAST      | Actin-binding protein                              |
| Sponge Cortactin-like    | N.A.     | N.A.            | N.A.                                               |
| Fly Cortactin            | 24648611 | N.A.            | CG3637 Cortactin                                   |
| Human Cortactin          | 2498954  | SRC8_HUMAN      | Src substrate cortactin (Amplixin) (Oncogene EMS1) |
| Human HCLS1              | 123557   | HCLS1_HUMAN     | Hematopoietic lineage cell-specific protein        |

**Table S1.12. Metabotropic GluR and GABAB Receptor families.**

| Abbreviation         | gi       | Swissprot Locus | Description                                                     |
|----------------------|----------|-----------------|-----------------------------------------------------------------|
| At GLR33             | 41017227 | GLR33_ARATH     | Glutamate receptor 3.3 precursor (Ligand-gated ion channel 3.3) |
| Os GLR               | 50904793 | N.A.            | putative glutamate receptor                                     |
| Dicty GABABR-like    | 60463477 | N.A.            | G-protein-coupled receptor (GPCR) family protein                |
| Sponge mGluR-like(1) | N.A.     | N.A.            | N.A.                                                            |
| Sponge mGluR-like(2) | N.A.     | N.A.            | N.A.                                                            |

|                      |          |             |                                                      |
|----------------------|----------|-------------|------------------------------------------------------|
| Sponge mGluR-like(3) | N.A.     | N.A.        | N.A.                                                 |
| Sponge mGluR-like(4) | N.A.     | N.A.        | N.A.                                                 |
| Sponge mGluR-like(5) | N.A.     | N.A.        | N.A.                                                 |
| Sponge mGluR-like(6) | N.A.     | N.A.        | N.A.                                                 |
| Sponge mGluR-like(7) | N.A.     | N.A.        | N.A.                                                 |
| Sponge mGluR-like(8) | N.A.     | N.A.        | N.A.                                                 |
| Sponge GABABR-like   | N.A.     | N.A.        | N.A.                                                 |
| Fly GABABR 1         | 13160942 | N.A.        | CG15274 metabotropic GABA-B receptor subtype 1       |
| Fly GABABR 2         | 13160945 | N.A.        | CG6706 metabotropic GABA-B receptor subtype 2        |
| Fly GABABR 3         | 24580689 | N.A.        | CG3022 metabotropic GABA-B receptor subtype 3        |
| Fly mGluR            | 17380359 | MGR_DROME   | CG11144 Metabotropic glutamate receptor              |
| Fly mGluXR           | 42538965 | N.A.        | CG30361 metabotropic X receptor                      |
| Human GABABR 1       | 12643873 | GABR1_HUMAN | GABA-B receptor 1                                    |
| Human GABABR 2       | 12643641 | GABR2_HUMAN | GABA-B receptor 2                                    |
| Human mGluR 1        | 62297775 | MGR1_HUMAN  | Metabotropic glutamate receptor 1                    |
| Human mGluR 2        | 76803802 | MGR2_HUMAN  | Metabotropic glutamate receptor 2                    |
| Human mGluR 3        | 76803803 | MGR3_HUMAN  | Metabotropic glutamate receptor 3                    |
| Human mGluR 4        | 2495077  | MGR4_HUMAN  | Metabotropic glutamate receptor 4                    |
| Human mGluR 5        | 1709020  | MGR5_HUMAN  | Metabotropic glutamate receptor 5                    |
| Human mGluR 6        | 3024134  | MGR6_HUMAN  | Metabotropic glutamate receptor 6                    |
| Human mGluR 7        | 2495078  | MGR7_HUMAN  | Metabotropic glutamate receptor 7                    |
| Human mGluR 8        | 12644040 | MGR8_HUMAN  | Metabotropic glutamate receptor 8                    |
| Human CASR           | 1168781  | CASR_HUMAN  | Extracellular calcium-sensing receptor               |
| Human GPC6A          | 74745292 | GPC6A_HUMAN | G-protein coupled receptor family C group 6 member A |
| Human TS1R 1         | 57013075 | TS1R1_HUMAN | Taste receptor type 1 member 1                       |
| Human TS1R 2         | 57013086 | TS1R2_HUMAN | Taste receptor type 1 member 2                       |
| Human TS1R 3         | 62299063 | TS1R3_HUMAN | Taste receptor type 1 member 3                       |

**Table S1.13. PKC family.**

| Abbreviation      | gi        | Swissprot Locus | Description                                                 |
|-------------------|-----------|-----------------|-------------------------------------------------------------|
| At PKC-like       | 21431798  | KPK19_ARATH     | Serine/threonine-protein kinase AtPK19                      |
| Os PKC-like       | 108707998 | N.A.            | Serine/threonine-protein kinase AtPK19, putative, expressed |
| Dicty PKC-like    | 1730069   | KRAC_DICDI      | RAC-family serine/threonine-protein kinase homolog          |
| Yeast PKC-like    | 585365    | KPC1_YEAST      | Protein kinase C-like 1 (PKC 1)                             |
| Sponge PKC1       | N.A.      | N.A.            | N.A.                                                        |
| Sponge PKC2       | N.A.      | N.A.            | N.A.                                                        |
| Sponge PKC3       | N.A.      | N.A.            | N.A.                                                        |
| Fly PKC1          | 26006990  | KPC1_DROME      | CG6622 Protein kinase C, brain isozyme (PKC)                |
| Fly PKC2          | 125543    | KPC2_DROME      | CG6518 Protein kinase C, eye isozyme (PKC)                  |
| Fly PKC3          | 125547    | KPC3_DROME      | CG1954 Protein kinase C (PKC) (dPKC98F)                     |
| Fly PKC4          | 31340528  | KPC4_DROME      | CG10524 Putative protein kinase C, delta type homolog       |
| Fly aPKC          | 24653760  | N.A.            | CG10261 atypical protein kinase C                           |
| Human PKC delta   | 547803    | KPCD_HUMAN      | Protein kinase C delta type                                 |
| Human PKC theta   | 20141582  | KPCT_HUMAN      | Protein kinase C theta type                                 |
| Human PKC eta     | 1346393   | KPCL_HUMAN      | Protein kinase C eta type                                   |
| Human PKC epsilon | 400135    | KPCE_HUMAN      | Protein kinase C epsilon type                               |
| Human PKC beta    | 20141488  | KPCB_HUMAN      | Protein kinase C beta type                                  |
| Human PKC alpha   | 125549    | KPCA_HUMAN      | Protein kinase C alpha type                                 |
| Human PKC gamma   | 462455    | KPCG_HUMAN      | Protein kinase C gamma type                                 |
| Human PKC zeta    | 68067736  | KPCZ_HUMAN      | Protein kinase C zeta type                                  |
| Human PKC iota    | 1170688   | KPCI_HUMAN      | Protein kinase C iota type                                  |

**Table S1.14. Alpha Catenin family.**

| Abbreviation              | gi       | Swissprot Locus | Description                                                                 |
|---------------------------|----------|-----------------|-----------------------------------------------------------------------------|
| Dicty Vinculin-like       | 66808591 | N.A.            | putative actin binding protein                                              |
| Sponge Alpha Catenin-like | N.A.     | N.A.            | N.A.                                                                        |
| Sponge Vinculin-like      | N.A.     | N.A.            | N.A.                                                                        |
| Fly Alpha Catenin         | 21264412 | CTNA_DROME      | CG17947 Catenin-alpha                                                       |
| Fly Alpha Catuln          | 24762469 | N.A.            | CG2987 alpha-catenin-related                                                |
| Fly Vinculin              | 50401320 | VINC_DROME      | CG3299 Vinculin                                                             |
| Human Alpha E-Catenin     | 461853   | CTN1_HUMAN      | Alpha-1 catenin (Cadherin-associated protein) (Alpha E-catenin)             |
| Human Alpha N-Catenin     | 14916980 | CTN2_HUMAN      | Alpha-2 catenin (Alpha-catenin-related protein) (Alpha N-catenin)           |
| Human Alpha T-Catenin     | 78099215 | CTN3_HUMAN      | Alpha-3 catenin (Alpha T-catenin) (Cadherin-associated protein)             |
| Human Alpha Catuln        | 62901512 | CTNL1_HUMAN     | Alpha-catuln (Catenin alpha-like protein 1) (Alpha-catenin-related protein) |
| Human Vinculin            | 21903479 | VINC_HUMAN      | Vinculin (Metavinculin)                                                     |

**Table S1.15. Citron family.**

| Abbreviation               | gi       | Swissprot Locus | Description                                |
|----------------------------|----------|-----------------|--------------------------------------------|
| At kinase_171888           | 15219591 | N.A.            | kinase                                     |
| At kinase_179637           | 15225358 | N.A.            | kinase                                     |
| Dicty kinase_642376        | 66816743 | N.A.            | putative protein serine/threonine kinase   |
| Sponge S_Tk1               | N.A.     | N.A.            | N.A.                                       |
| Sponge Citron-like (S_Tk2) | N.A.     | N.A.            | N.A.                                       |
| Sponge S_Tk3               | N.A.     | N.A.            | N.A.                                       |
| Fly Citron                 | 24663340 | N.A.            | CG10522                                    |
| Fly ROCK                   | 24642569 | N.A.            | CG9774 Rho-kinase                          |
| Fly MRCK                   | 24762562 | N.A.            | CG4012 genghis khan                        |
| Human Citron               | 57015279 | CTRO_HUMAN      | Citron Rho-interacting kinase (CRIK)       |
| Human ROCK1                | 47605999 | ROCK1_HUMAN     | Rho-associated protein kinase 1            |
| Human ROCK2                | 47605963 | ROCK2_HUMAN     | Rho-associated protein kinase 2            |
| Human MRCKA                | 74746874 | MRCKA_HUMAN     | Serine/threonine-protein kinase MRCK alpha |

|             |          |             |                                                             |
|-------------|----------|-------------|-------------------------------------------------------------|
| Human MRCKB | 92090617 | MRCKB_HUMAN | Serine/threonine-protein kinase MRCK beta                   |
| Human MRCKG | 74762299 | MRCKG_HUMAN | Serine/threonine-protein kinase MRCK gamma                  |
| Human DMPK  | 1706450  | DMPK_HUMAN  | Myotonin-protein kinase (Myotonic dystrophy protein kinase) |

**Table S1.16. Stargazin family.**

| Abbreviation                           | gi       | Swissprot Locus | Description                                       |
|----------------------------------------|----------|-----------------|---------------------------------------------------|
| Fly VD Calcium Channel-like            | 71854527 | N.A.            | CG33670                                           |
| Human VD Calcium Channel 2 (Stargazin) | 6685289  | CCG2_HUMAN      | Voltage-dependent calcium channel gamma-2 subunit |
| Human VD Calcium Channel 3             | 6685277  | CCG3_HUMAN      | Voltage-dependent calcium channel gamma-3 subunit |
| Human VD Calcium Channel 4             | 10719940 | CCG4_HUMAN      | Voltage-dependent calcium channel gamma-4 subunit |
| Human VD Calcium Channel 5             | 20532390 | CCG5_HUMAN      | Voltage-dependent calcium channel gamma-5 subunit |
| Human VD Calcium Channel 7             | 51702249 | CCG7_HUMAN      | Voltage-dependent calcium channel gamma-7 subunit |
| Human VD Calcium Channel 8             | 20532017 | CCG8_HUMAN      | Voltage-dependent calcium channel gamma-8 subunit |

**Table S1.17. Ephrin Receptor and ErbB Receptor families.**

| Abbreviation       | gi        | Swissprot Locus | Description                                                                           |
|--------------------|-----------|-----------------|---------------------------------------------------------------------------------------|
| At TyrK            | 397645    | N.A.            | protein tyrosine kinase                                                               |
| Os TyrK            | 18408889  | N.A.            | ATP binding / kinase/ protein kinase/ protein serine/threonine kinase                 |
| Dicty TyrK         | 108862829 | N.A.            | protein kinase family protein, putative, expressed                                    |
| Sponge Eph-like    | N.A.      | N.A.            | N.A.                                                                                  |
| Sponge Src-like(1) | N.A.      | N.A.            | N.A.                                                                                  |
| Sponge Src-like(2) | N.A.      | N.A.            | N.A.                                                                                  |
| Sponge Abl-like    | N.A.      | N.A.            | N.A.                                                                                  |
| Sponge Fps-like    | N.A.      | N.A.            | N.A.                                                                                  |
| Sponge Ror-like    | N.A.      | N.A.            | N.A.                                                                                  |
| Sponge FAK-like    | N.A.      | N.A.            | N.A.                                                                                  |
| Sponge ErbB-like   | N.A.      | N.A.            | N.A.                                                                                  |
| Fly Eph            | 62484409  | N.A.            | CG1511 Eph receptor tyrosine kinase                                                   |
| Fly ErbB           | 6175066   | EGFR_DROME      | CG10079 Epidermal growth factor receptor precursor (Egfr) (Gurken receptor)           |
| Fly Src42          | 33112450  | SRC42_DROME     | CG7873 Tyrosine-protein kinase Src42A (Dsrc41)                                        |
| Fly Src64          | 14286176  | SRC64_DROME     | CG7524 Tyrosine-protein kinase Src64B (Dsrc64)                                        |
| Fly Abl            | 62512130  | ABL_DROME       | CG4032 Tyrosine-protein kinase Abl (Abelson protein) (D-ash)                          |
| Fly Fps            | 44888970  | FPS_DROME       | CG8874 Tyrosine-protein kinase Fps85D (dFer)                                          |
| Fly Ror2           | 27923847  | ROR2_DROME      | CG4007 Tyrosine-protein kinase transmembrane receptor Ror2 precursor                  |
| Fly Ror1           | 27923846  | ROR1_DROME      | CG4926 Tyrosine-protein kinase transmembrane receptor Ror precursor                   |
| Fly Btk            | 25453425  | BTKL_DROME      | CG8049 Tyrosine-protein kinase Btk29A (Dsrc28C)                                       |
| Fly FAK            | 24655701  | N.A.            | CG10023 Focal Adhesion Kinase                                                         |
| Human Eph B1       | 1706663   | EPHB1_HUMAN     | Ephrin type-B receptor 1 precursor (Tyrosine-protein kinase receptor EPH-2)           |
| Human Eph B2       | 76803654  | EPHB2_HUMAN     | Ephrin type-B receptor 2 precursor (Tyrosine-protein kinase receptor EPH-3)           |
| Human Eph B3       | 76803655  | EPHB3_HUMAN     | Ephrin type-B receptor 3 precursor (Tyrosine-protein kinase receptor HEK-2)           |
| Human Eph B4       | 19860819  | EPHB4_HUMAN     | Ephrin type-B receptor 4 precursor (Tyrosine-protein kinase receptor HTK)             |
| Human Eph B6       | 6919882   | EPHB6_HUMAN     | Ephrin type-B receptor 6 precursor (Tyrosine-protein kinase-defective receptor EPH-6) |
| Human Eph A1       | 47117832  | EPHA1_HUMAN     | Ephrin type-A receptor 1 precursor (Tyrosine-protein kinase receptor EPH)             |
| Human Eph A2       | 125333    | EPHA2_HUMAN     | Ephrin type-A receptor 2 precursor (Tyrosine-protein kinase receptor ECK)             |
| Human Eph A3       | 125387    | EPHA3_HUMAN     | Ephrin type-A receptor 3 precursor (Tyrosine-protein kinase receptor ETK1)            |
| Human Eph A4       | 1711371   | EPHA4_HUMAN     | Ephrin type-A receptor 4 precursor (Tyrosine-protein kinase receptor SEK)             |
| Human Eph A5       | 1706628   | EPHA5_HUMAN     | Ephrin type-A receptor 5 precursor (Tyrosine-protein kinase receptor EHK-1)           |
| Human Eph A7       | 68846922  | EPHA7_HUMAN     | Ephrin type-A receptor 7 precursor (Tyrosine-protein kinase receptor EHK-3)           |
| Human Eph A8       | 19857975  | EPHA8_HUMAN     | Ephrin type-A receptor 8 precursor (Tyrosine-protein kinase receptor EEK)             |
| Human Eph A10      | 74762207  | EPHA10_HUMAN    | Ephrin type-A receptor 10 precursor                                                   |
| Human Src          | 125711    | SRC_HUMAN       | Proto-oncogene tyrosine-protein kinase Src (p60-Src)                                  |
| Human FRK          | 1169745   | FRK_HUMAN       | Tyrosine-protein kinase FRK                                                           |
| Human Fyn          | 125370    | FYN_HUMAN       | Proto-oncogene tyrosine-protein kinase Fyn (p59-Fyn)                                  |
| Human Yes          | 125870    | YES_HUMAN       | Proto-oncogene tyrosine-protein kinase Yes (p61-Yes)                                  |
| Human FGR          | 125358    | FGR_HUMAN       | Proto-oncogene tyrosine-protein kinase FGR (P55-FGR)                                  |
| Human HCK          | 20141296  | HCK_HUMAN       | Tyrosine-protein kinase HCK (p59-HCK/p60-HCK)                                         |
| Human LCK          | 125474    | LCK_HUMAN       | Proto-oncogene tyrosine-protein kinase LCK (p56-LCK)                                  |
| Human Lyn          | 125480    | LYN_HUMAN       | Tyrosine-protein kinase Lyn                                                           |
| Human BLK          | 1705485   | BLK_HUMAN       | Tyrosine-protein kinase BLK (B lymphocyte kinase) (p55-BLK)                           |
| Human Srms         | 27805732  | SRMS_HUMAN      | Tyrosine-protein kinase Srms                                                          |
| Human ABL1         | 85681908  | ABL1_HUMAN      | Proto-oncogene tyrosine-protein kinase ABL1 (p150)                                    |
| Human ABL2         | 1168268   | ABL2_HUMAN      | Tyrosine-protein kinase ABL2 (Abelson murine leukemia viral oncogene homolog 2)       |
| Human Fes          | 400127    | FES_HUMAN       | Proto-oncogene tyrosine-protein kinase Fes/Fps                                        |
| Human FER          | 97536202  | FER_HUMAN       | Proto-oncogene tyrosine-protein kinase FER (p94-FER)                                  |
| Human Ror2         | 90110767  | ROR2_HUMAN      | Tyrosine-protein kinase transmembrane receptor ROR2 precursor                         |
| Human Ror1         | 19924290  | ROR1_HUMAN      | Tyrosine-protein kinase transmembrane receptor ROR1 precursor                         |
| Human NTRK1        | 94730402  | NTRK1_HUMAN     | High affinity nerve growth factor receptor precursor                                  |
| Human MUSK         | 50400806  | MUSK_HUMAN      | Muscle, skeletal receptor tyrosine protein kinase precursor                           |
| Human NTRK2        | 2497560   | NTRK2_HUMAN     | BDNF/NT-3 growth factors receptor precursor                                           |
| Human NTRK3        | 2497562   | NTRK3_HUMAN     | NT-3 growth factor receptor precursor                                                 |
| Human BTK          | 547759    | BTK_HUMAN       | Tyrosine-protein kinase BTK (Bruton tyrosine kinase)                                  |
| Human Tec          | 1174630   | TEC_HUMAN       | Tyrosine-protein kinase Tec                                                           |
| Human ITK          | 585361    | ITK_HUMAN       | Tyrosine-protein kinase ITK/TSK (T-cell-specific kinase)                              |
| Human TXK          | 1351326   | TXK_HUMAN       | Tyrosine-protein kinase TXK                                                           |
| Human BMX          | 1705489   | BMX_HUMAN       | Cytoplasmic tyrosine-protein kinase BMX                                               |
| Human FAK1         | 3183518   | FAK1_HUMAN      | Focal adhesion kinase 1 (FADK 1) (pp125FAK)                                           |
| Human FAK2         | 3183003   | FAK2_HUMAN      | Protein tyrosine kinase 2 beta (Focal adhesion kinase 2)                              |
| Human ErbB1        | 2811086   | EGFR_HUMAN      | Epidermal growth factor receptor precursor (Receptor tyrosine-protein kinase ErbB-1)  |
| Human ErbB3        | 119534    | ERBB3_HUMAN     | Receptor tyrosine-protein kinase erbB-3 precursor (c-erbB3)                           |
| Human ErbB4        | 3913590   | ERBB4_HUMAN     | Receptor tyrosine-protein kinase erbB-4 precursor (p180erbB4)                         |
| Human ErbB2        | 119533    | ERBB2_HUMAN     | Receptor tyrosine-protein kinase erbB-2 precursor (p185erbB2)                         |

**Table S1.18. Neuroligin family.**

| Abbreviation        | gi       | Swissprot Locus | Description                                                                     |
|---------------------|----------|-----------------|---------------------------------------------------------------------------------|
| Dicty CES-like      | 66802562 | N.A.            | hypothetical protein DDBDRAFT_0183832                                           |
| Sponge CES-like     | N.A.     | N.A.            | N.A.                                                                            |
| CN NRL-like(1)      | N.A.     | N.A.            | N.A.                                                                            |
| CN NRL-like(2)      | N.A.     | N.A.            | N.A.                                                                            |
| CN NRL-like(3)      | N.A.     | N.A.            | N.A.                                                                            |
| CN NRL-like(4)      | N.A.     | N.A.            | N.A.                                                                            |
| CN NRL-like(5)      | N.A.     | N.A.            | N.A.                                                                            |
| CN NRL-like(6)      | N.A.     | N.A.            | N.A.                                                                            |
| Fly Neuroligin 1    | 7716610  | N.A.            | CG13772 neuroligin                                                              |
| Fly Neuroligin 2    | 28381150 | N.A.            | CG31146                                                                         |
| Fly Gliotactin      | 24584488 | N.A.            | CG3903 Gliotactin                                                               |
| Fly ACES            | 113036   | ACES_DROME      | Acetylcholinesterase precursor (AChE)                                           |
| Human Neuroligin 3  | 31076855 | NLGN3_HUMAN     | Neuroligin-3 precursor (Gliotactin homolog)                                     |
| Human Neuroligin 4X | 31076821 | NLGNX_HUMAN     | Neuroligin-4, X-linked precursor (Neuroligin X) (HNLX)                          |
| Human Neuroligin 4Y | 31076823 | NLGNY_HUMAN     | Neuroligin-4, Y-linked precursor (Neuroligin Y)                                 |
| Human Neuroligin 1  | 31076822 | NLGN1_HUMAN     | Neuroligin-1 precursor                                                          |
| Human Neuroligin 2  | 31076824 | NLGN2_HUMAN     | Neuroligin-2 precursor                                                          |
| Human ACES          | 113037   | ACES_HUMAN      | Acetylcholinesterase precursor (AChE)                                           |
| Human CHLE          | 116353   | CHLE_HUMAN      | Cholinesterase precursor (Acylcholine acylhydrolase)                            |
| Human CEL           | 231629   | CEL_HUMAN       | Bile salt-activated lipase precursor (BAL) (Bile salt-stimulated lipase) (BSSL) |
| Human EST2          | 46576349 | EST2_HUMAN      | Carboxylesterase 2 precursor (CE-2) (hCE-2)                                     |
| Human EST1          | 119576   | EST1_HUMAN      | Liver carboxylesterase 1 precursor                                              |

**Table S1.19. Ionotropic Glutamate Receptor families.**

| Abbreviation      | gi        | Swissprot Locus | Description                                                                  |
|-------------------|-----------|-----------------|------------------------------------------------------------------------------|
| At GLR33          | 39545692  | N.A.            | GLR3.3                                                                       |
| Os GLR            | 50904793  | N.A.            | putative glutamate receptor                                                  |
| CN NMDAR-like (1) | N.A.      | N.A.            | N.A.                                                                         |
| CN NMDAR-like (2) | N.A.      | N.A.            | N.A.                                                                         |
| CN NMDAR-like (3) | N.A.      | N.A.            | N.A.                                                                         |
| CN NMDAR-like (4) | N.A.      | N.A.            | N.A.                                                                         |
| CN NMDAR-like (5) | N.A.      | N.A.            | N.A.                                                                         |
| CN NMDAR-like (6) | N.A.      | N.A.            | N.A.                                                                         |
| CN NMDAR-like (7) | N.A.      | N.A.            | N.A.                                                                         |
| CN NMDAR-like (8) | N.A.      | N.A.            | N.A.                                                                         |
| CN GLR-like (1)   | N.A.      | N.A.            | N.A.                                                                         |
| CN GLR-like (2)   | N.A.      | N.A.            | N.A.                                                                         |
| CN GLR-like (3)   | N.A.      | N.A.            | N.A.                                                                         |
| Fly GLR 1         | 68067727  | GLK1_DROME      | CG8442 Glutamate receptor 1 (dGLUR-1)                                        |
| Fly GLR 2         | 24648559  | N.A.            | CG3822                                                                       |
| Fly GLR 3         | 61699735  | N.A.            | CG11155                                                                      |
| Fly GLR 4         | 23171826  | N.A.            | CG5621                                                                       |
| Fly GLR 5         | 6687415   | N.A.            | CG18039 KaiRIA ionotropic glutamate receptor subunit IA                      |
| Fly GLR 6         | 24581972  | N.A.            | CG6992 Glutamate receptor IIA                                                |
| Fly GLR 7         | 24648476  | N.A.            | CG31201 Glutamate receptor IIE                                               |
| Fly GLR 8         | 24661440  | N.A.            | CG4481 Glutamate receptor IB                                                 |
| Fly GLR 9         | 45549153  | N.A.            | CG7234 Glutamate receptor IIB                                                |
| Fly GLR 10        | 22945551  | N.A.            | CG4226                                                                       |
| Fly GLR 11        | 24581733  | N.A.            | CG15627                                                                      |
| Fly GLR 12        | 116007354 | N.A.            | CG8681 clumsy                                                                |
| Fly GLR 13        | 85682857  | N.A.            | CG10633                                                                      |
| Fly GLR 14        | 24666122  | N.A.            | CG14586                                                                      |
| Fly GLR 15        | 24666536  | N.A.            | CG14076                                                                      |
| Fly GLR 16        | 24667182  | N.A.            | CG7385                                                                       |
| Fly GLR 17        | 28572148  | N.A.            | CG17274                                                                      |
| Fly GLR 18        | 85683065  | N.A.            | CG32704                                                                      |
| Fly GLR 19        | 24644826  | N.A.            | CG10101                                                                      |
| Fly NMDAR 1       | 24644257  | N.A.            | CG2902 NMDA receptor 1                                                       |
| Fly NMDAR 2       | 48095783  | N.A.            | CG33513 NMDA receptor subunit 2                                              |
| Human AMPAR 1     | 1169959   | GRIA1_HUMAN     | Glutamate receptor 1 precursor (GluR-1) (GluR-A) (GluR-K1) (AMPA 1)          |
| Human AMPAR 2     | 23831146  | GRIA2_HUMAN     | Glutamate receptor 2 precursor (GluR-2) (GluR-B) (GluR-K2) (AMPA 2)          |
| Human AMPAR 3     | 77416864  | GRIA3_HUMAN     | Glutamate receptor 3 precursor (GluR-3) (GluR-C) (GluR-K3) (AMPA 3)          |
| Human AMPAR 4     | 1346142   | GRIA4_HUMAN     | Glutamate receptor 4 precursor (GluR-4) (GluR4) (GluR-D) (AMPA 4)            |
| Human KainateR 1  | 729597    | GRIK1_HUMAN     | Glutamate receptor, ionotropic kainate 1 precursor (Glutamate receptor 5)    |
| Human KainateR 2  | 2492627   | GRIK2_HUMAN     | Glutamate receptor, ionotropic kainate 2 precursor (Glutamate receptor 6)    |
| Human KainateR 3  | 3287976   | GRIK3_HUMAN     | Glutamate receptor, ionotropic kainate 3 precursor (Glutamate receptor 7)    |
| Human KainateR 4  | 3287848   | GRIK4_HUMAN     | Glutamate receptor, ionotropic kainate 4 precursor (Glutamate receptor KA-1) |
| Human KainateR 5  | 3287849   | GRIK5_HUMAN     | Glutamate receptor, ionotropic kainate 5 precursor (Glutamate receptor KA-2) |
| Human DeltaR 1    | 38372397  | GRIK1_HUMAN     | Glutamate receptor delta-1 subunit precursor (GluR delta-1)                  |
| Human DeltaR 2    | 25090493  | GRID2_HUMAN     | Glutamate receptor delta-2 subunit precursor (GluR delta-2)                  |
| Human NMDAR 1     | 2343289   | N.A.            | NMDAR1 subunit                                                               |
| Human NMDAR 2A    | 14285603  | NMDE1_HUMAN     | Glutamate [NMDA] receptor subunit epsilon 1 precursor (NR2A)                 |
| Human NMDAR 2B    | 14548162  | NMDE2_HUMAN     | Glutamate [NMDA] receptor subunit epsilon 2 precursor (NR2B)                 |
| Human NMDAR 2C    | 2492629   | NMDE3_HUMAN     | Glutamate [NMDA] receptor subunit epsilon 3 precursor (NR2C)                 |
| Human NMDAR 2D    | 18201966  | NMDE4_HUMAN     | Glutamate [NMDA] receptor subunit epsilon 4 precursor (NR2D)                 |
| Human NMDAR 3A    | 51701684  | NMD3A_HUMAN     | Glutamate [NMDA] receptor subunit 3A precursor (NR3A)                        |
| Human NMDAR 3B    | 71153527  | NMD3B_HUMAN     | Glutamate [NMDA] receptor subunit 3B precursor (NR3B)                        |

**Table S1.20. K+ Channel Kir family.**

| Abbreviation      | gi       | Swissprot Locus | Description                                     |
|-------------------|----------|-----------------|-------------------------------------------------|
| Sponge Kir-like 1 | N.A.     | N.A.            | N.A.                                            |
| Sponge Kir-like 2 | N.A.     | N.A.            | N.A.                                            |
| Fly Kir 1         | 24649234 | N.A.            | CG6747 Inwardly rectifying potassium channel    |
| Fly Kir 2         | 24649329 | N.A.            | CG4370 Inwardly rectifying potassium channel 2  |
| Fly Kir 3         | 62484243 | N.A.            | CG10369 Inwardly rectifying potassium channel 3 |
| Human Kir 1.3     | 77416869 | IRK15_HUMAN     | Inward rectifier K(+) channel Kir4.2 (Kir1.3)   |
| Human Kir 1.2     | 2493605  | IRK10_HUMAN     | Inward rectifier K(+) channel Kir1.2            |
| Human Kir 1.1     | 1352479  | IRK1_HUMAN      | ATP-regulated potassium channel ROM-K (Kir1.1)  |
| Human Kir 7.1     | 13878543 | IRK13_HUMAN     | Inward rectifier K(+) channel Kir7.1            |
| Human Kir 2.2     | 77416868 | IRK12_HUMAN     | Inward rectifier K(+) channel Kir2.2            |
| Human Kir 2.3     | 1352483  | IRK4_HUMAN      | Inward rectifier K(+) channel Kir2.3            |
| Human Kir 2.1     | 54037433 | IRK2_HUMAN      | Inward rectifier K(+) channel Kir2.1            |
| Human Kir 2.4     | 54036159 | IRK14_HUMAN     | Inward rectifier K(+) channel Kir2.4            |
| Human Kir 5.1     | 13878562 | IRK16_HUMAN     | Inward rectifier K(+) channel Kir5.1            |
| Human Kir 3.2     | 1352487  | IRK6_HUMAN      | Inward rectifier K(+) channel Kir3.2            |
| Human Kir 3.4     | 1352484  | IRK5_HUMAN      | Inward rectifier K(+) channel Kir3.4            |
| Human Kir 3.3     | 2493603  | IRK9_HUMAN      | Inward rectifier K(+) channel Kir3.3            |
| Human Kir 3.1     | 1352482  | IRK3_HUMAN      | Inward rectifier K(+) channel Kir3.1            |
| Human Kir 6.1     | 2493600  | IRK8_HUMAN      | Inwardly rectifier K(+) channel Kir6.1          |
| Human Kir 6.2     | 76803775 | IRK11_HUMAN     | Inwardly rectifier K(+) channel Kir6.2          |

**Table S1.21. K+ Channel Shaker family.**

| Abbreviation    | gi       | Swissprot Locus | Description                                                    |
|-----------------|----------|-----------------|----------------------------------------------------------------|
| CN Kv 1-like(1) | N.A.     | N.A.            | N.A.                                                           |
| CN Kv 1-like(2) | N.A.     | N.A.            | N.A.                                                           |
| CN Kv 1-like(3) | N.A.     | N.A.            | N.A.                                                           |
| CN Kv 3-like    | N.A.     | N.A.            | N.A.                                                           |
| Fly Kv 1        | 13432103 | KCNAS_DROME     | CG12348 Potassium voltage-gated channel protein Shaker         |
| Fly Kv 3.1      | 28574020 | N.A.            | CG2822 Shaker cognate w                                        |
| Fly Kv 3.2      | 45445057 | N.A.            | CG4450                                                         |
| Human Kv 1.1    | 1168947  | KCNA1_HUMAN     | Voltage-gated potassium channel subunit Kv1.1                  |
| Human Kv 1.2    | 1345813  | KCNA2_HUMAN     | Voltage-gated potassium channel subunit Kv1.2                  |
| Human Kv 1.3    | 1168948  | KCNA3_HUMAN     | Voltage-gated potassium channel subunit Kv1.3                  |
| Human Kv 1.4    | 116430   | KCNA4_HUMAN     | Voltage-gated potassium channel subunit Kv1.4                  |
| Human Kv 1.5    | 1705863  | KCNA5_HUMAN     | Voltage-gated potassium channel subunit Kv1.5                  |
| Human Kv 1.6    | 116434   | KCNA6_HUMAN     | Voltage-gated potassium channel subunit Kv1.6                  |
| Human Kv 1.7    | 14485555 | N.A.            | voltage-gated potassium channel KCNA7                          |
| Human Kv 3.1    | 1352085  | KCNC1_HUMAN     | Voltage-gated potassium channel subunit Kv3.1                  |
| Human Kv 3.2    | 21999191 | N.A.            | potassium voltage-gated potassium channel subfamily C member 2 |
| Human Kv 3.3    | 8488974  | KCNC3_HUMAN     | Voltage-gated potassium channel subunit Kv3.3                  |
| Human Kv 3.4    | 66774206 | KCNC4_HUMAN     | Voltage-gated potassium channel subunit Kv3.4                  |

**Table S1.22. Classical Cadherin family.**

| Abbreviation              | gi       | Swissprot Locus | Description                                                                      |
|---------------------------|----------|-----------------|----------------------------------------------------------------------------------|
| Sponge Classical Cadherin | N.A.     | N.A.            | N.A.                                                                             |
| Fly Dachshous             | 25090185 | DS_DROME        | CG17941 Protein dachshous precursor (Adherin)                                    |
| Fly N-Cadherin            | 13124002 | CADN_DROME      | CG7100 Neural-cadherin precursor (Cadherin-N protein) (DN-cadherin)              |
| Fly N-Cadherin2           | 27923751 | CADN2_DROME     | CG7527 Putative neural-cadherin 2 precursor (Cadherin-N2 protein) (DN2-cadherin) |
| Fly DE-Cadherin           | 13124007 | CADE_DROME      | CG3722 DE-cadherin precursor (Protein shotgun)                                   |
| Human Dachshous           | 20139065 | PCD16_HUMAN     | Protocadherin-16 precursor (Dachshous 1) (Cadherin-19) (Fibroblast cadherin 1)   |
| Human N-Cadherin          | 1705541  | CADH2_HUMAN     | Neural-cadherin precursor (N-cadherin) (Cadherin-2) (CDw325 antigen)             |
| Human R-Cadherin          | 81175161 | CADH4_HUMAN     | Cadherin-4 precursor (Retinal-cadherin) (R-cadherin) (R-CAD)                     |
| Human E-Cadherin          | 399166   | CADH1_HUMAN     | Epithelial-cadherin precursor (E-cadherin) (Uvomorulin) (Cadherin-1)             |
| Human P-Cadherin          | 115427   | CADH3_HUMAN     | Cadherin-3 precursor (Placental-cadherin) (P-cadherin)                           |
| Human M-Cadherin          | 1705553  | CAD15_HUMAN     | Muscle-cadherin precursor (M-cadherin) (Cadherin-15)                             |
| Human OB-Cadherin         | 1705548  | CAD11_HUMAN     | Cadherin-11 precursor (Osteoblast-cadherin) (OB-cadherin) (OSF-4)                |
| Human K-Cadherin          | 1705545  | CADH6_HUMAN     | Cadherin-6 precursor (Kidney-cadherin) (K-cadherin)                              |
| Human T2-Cadherin         | 13431364 | CAD10_HUMAN     | Cadherin-10 precursor (T2-cadherin)                                              |
| Human Cadherin 7          | 17367151 | CADH7_HUMAN     | Cadherin-7 precursor                                                             |
| Human Cadherin 9          | 13431362 | CADH9_HUMAN     | Cadherin-9 precursor                                                             |
| Human BR-Cadherin         | 1705551  | CAD12_HUMAN     | Cadherin-12 precursor (Brain-cadherin) (BR-cadherin) (N-cadherin 2)              |
| Human Cadherin 18         | 3023435  | CAD18_HUMAN     | Cadherin-18 precursor (Cadherin-14)                                              |
| Human Cadherin 20         | 17366842 | CAD20_HUMAN     | Cadherin-20 precursor                                                            |
| Human Cadherin 24         | 38257450 | CAD24_HUMAN     | Cadherin-24 precursor                                                            |
| Human PB-Cadherin         | 24211543 | CAD22_HUMAN     | Cadherin-22 precursor (Pituitary and brain cadherin) (PB-cadherin)               |
| Human VE-Cadherin         | 13432109 | CADH5_HUMAN     | Cadherin-5 precursor (Vascular endothelial-cadherin) (VE-cadherin)               |
| Human Cadherin 19         | 13431344 | CAD17_HUMAN     | Cadherin-17 precursor (Liver-intestine-cadherin) (LI-cadherin)                   |

**Table S1.23. DLG, Shank, GRIP, MAGI, LIN-7, LIMK, Mint, Tamalin, Erbin, NOS, PICK1 and CASK families.**

| Abbreviation                    | gi   | Swissprot Locus | Description |
|---------------------------------|------|-----------------|-------------|
| At SP PDZ                       |      |                 |             |
| Sponge DLG PDZ1 (AA 144 - 223)  | N.A. | N.A.            | N.A.        |
| Sponge DLG PDZ2 (AA 274 - 353)  | N.A. | N.A.            | N.A.        |
| Sponge DLG PDZ3 (AA 397 - 470)  | N.A. | N.A.            | N.A.        |
| Sponge Lin7 PDZ (AA 111 - 185)  | N.A. | N.A.            | N.A.        |
| Sponge GRIP PDZ1 (AA 35 - 109)  | N.A. | N.A.            | N.A.        |
| Sponge GRIP PDZ2 (AA 136 - 210) | N.A. | N.A.            | N.A.        |
| Sponge GRIP PDZ4 (AA 278 - 354) | N.A. | N.A.            | N.A.        |
| Sponge GRIP PDZ5 (AA 376 - 447) | N.A. | N.A.            | N.A.        |

|                                       |          |             |                                                                              |
|---------------------------------------|----------|-------------|------------------------------------------------------------------------------|
| Sponge GRIP PDZ6 (AA 475 - 549)       | N.A.     | N.A.        | N.A.                                                                         |
| Sponge GRIP PDZ7 (AA 836 - 907)       | N.A.     | N.A.        | N.A.                                                                         |
| Sponge Shank PDZ (AA 495 - 574)       | N.A.     | N.A.        | N.A.                                                                         |
| Sponge NOS PDZ (AA 16 - 88)           | N.A.     | N.A.        | N.A.                                                                         |
| Sponge PICK1 PDZ (AA 13 - 87)         | N.A.     | N.A.        | N.A.                                                                         |
| Sponge Magi PDZ1 (AA 34 - 108)        | N.A.     | N.A.        | N.A.                                                                         |
| Sponge Magi PDZ2 (AA 424 - 500)       | N.A.     | N.A.        | N.A.                                                                         |
| Sponge Magi PDZ3 (AA 561 - 631)       | N.A.     | N.A.        | N.A.                                                                         |
| Sponge Magi PDZ4 (AA 678 - 754)       | N.A.     | N.A.        | N.A.                                                                         |
| Sponge Magi PDZ5 (AA 790 - 863)       | N.A.     | N.A.        | N.A.                                                                         |
| Sponge Magi PDZ6 (AA 951 - 1026)      | N.A.     | N.A.        | N.A.                                                                         |
| Sponge Mint PDZ1 (AA 364 - 442)       | N.A.     | N.A.        | N.A.                                                                         |
| Sponge Mint PDZ2 (AA 443 - 515)       | N.A.     | N.A.        | N.A.                                                                         |
| Sponge Tamalin PDZ (AA 126 - 202)     | N.A.     | N.A.        | N.A.                                                                         |
| CN Erbin-like PDZ (AA 966 - 1046)     | N.A.     | N.A.        | N.A.                                                                         |
| CN CASK PDZ (AA 625 - 721)            | N.A.     | N.A.        | N.A.                                                                         |
| Fly DLG PDZ1 (AA 224 - 303)           | 51704269 | DLG1_DROME  | CG1725 Discs large 1 tumor suppressor protein                                |
| Fly DLG PDZ2 (AA 338 - 421)           | 51704269 | DLG1_DROME  | CG1725 Discs large 1 tumor suppressor protein                                |
| Fly DLG PDZ3 (AA 514 - 587)           | 51704269 | DLG1_DROME  | CG1725 Discs large 1 tumor suppressor protein                                |
| Fly Shank PDZ (AA 688 - 773)          | 24653538 | N.A.        | CG30483 Prosap                                                               |
| Fly Lin7 PDZ (AA 101 - 175)           | 21356237 | N.A.        | CG7662 veli                                                                  |
| Fly GRIP PDZ1 (AA 90 - 165)           | 24640023 | N.A.        | CG14447 Glutamate receptor binding protein                                   |
| Fly GRIP PDZ2 (AA 191 - 276)          | 24640023 | N.A.        | CG14447 Glutamate receptor binding protein                                   |
| Fly GRIP PDZ3 (AA 289 - 386)          | 24640023 | N.A.        | CG14447 Glutamate receptor binding protein                                   |
| Fly GRIP PDZ4 (AA 475 - 543)          | 24640023 | N.A.        | CG14447 Glutamate receptor binding protein                                   |
| Fly GRIP PDZ5 (AA 582 - 661)          | 24640023 | N.A.        | CG14447 Glutamate receptor binding protein                                   |
| Fly GRIP PDZ6 (AA 842 - 916)          | 24640023 | N.A.        | CG14447 Glutamate receptor binding protein                                   |
| Fly GRIP PDZ7 (AA 985 - 1058)         | 24640023 | N.A.        | CG14447 Glutamate receptor binding protein                                   |
| Fly CASK PDZ (AA 504 - 576)           | 34223738 | CAK1_DROME  | CG6703 Calcium/calmodulin-dependent protein kinase (CaMGUK)                  |
| Fly PICK1 PDZ (AA 33 - 105)           | 28574146 | N.A.        | CG6167 PICK1                                                                 |
| Fly Magi PDZ2 (AA 454 - 535)          | 20304109 | N.A.        | CG30388 Magi                                                                 |
| Fly Magi PDZ3 (AA 609 - 679)          | 20304109 | N.A.        | CG30388 Magi                                                                 |
| Fly Magi PDZ4 (AA 936 - 1012)         | 20304109 | N.A.        | CG30388 Magi                                                                 |
| Fly Magi PDZ5 (AA 1040 - 1114)        | 20304109 | N.A.        | CG30388 Magi                                                                 |
| Fly Mint PDZ1 (AA 995 - 1073)         | 24642814 | N.A.        | CG5675 X11L                                                                  |
| Fly Mint PDZ2 (AA 1087 - 1153)        | 24642814 | N.A.        | CG5675 X11L                                                                  |
| Fly LIMK PDZ (AA 186 - 274)           | 74865306 | LIMK1_DROME | CG1848 LIM domain kinase 1 (LIMK-1) (dLIMK)                                  |
| Fly Tamalin PDZ (AA 139 - 219)        | 45550544 | N.A.        | CG6619                                                                       |
| Human SAP97 PDZ1 (AA 232 - 311)       | 2497504  | DLG1_HUMAN  | Disks large homolog 1 (Synapse-associated protein 97) (SAP-97) (hDlg)        |
| Human SAP97 PDZ2 (AA 327 - 406)       | 2497504  | DLG1_HUMAN  | Disks large homolog 1 (Synapse-associated protein 97) (SAP-97) (hDlg)        |
| Human SAP97 PDZ3 (AA 474 - 547)       | 2497504  | DLG1_HUMAN  | Disks large homolog 1 (Synapse-associated protein 97) (SAP-97) (hDlg)        |
| Human C110 PDZ1 (AA 106 - 185)        | 73920200 | DLG2_HUMAN  | Disks large homolog 2 (Channel-associated protein of synapse-110)            |
| Human C110 PDZ2 (AA 201 - 280)        | 73920200 | DLG2_HUMAN  | Disks large homolog 2 (Channel-associated protein of synapse-110)            |
| Human C110 PDZ3 (AA 429 - 502)        | 73920200 | DLG2_HUMAN  | Disks large homolog 2 (Channel-associated protein of synapse-110)            |
| Human SAP102 PDZ1 (AA 139 - 218)      | 2497506  | DLG3_HUMAN  | Disks large homolog 3 (Synapse-associated protein 102) (SAP102)              |
| Human SAP102 PDZ2 (AA 234 - 313)      | 2497506  | DLG3_HUMAN  | Disks large homolog 3 (Synapse-associated protein 102) (SAP102)              |
| Human SAP102 PDZ3 (AA 394 - 467)      | 2497506  | DLG3_HUMAN  | Disks large homolog 3 (Synapse-associated protein 102) (SAP102)              |
| Human PSD95 PDZ1 (AA 73 - 152)        | 71658825 | DLG4_HUMAN  | Disks large homolog 4 (Postsynaptic density protein 95) (PSD-95)             |
| Human PSD95 PDZ2 (AA 168 - 247)       | 71658825 | DLG4_HUMAN  | Disks large homolog 4 (Postsynaptic density protein 95) (PSD-95)             |
| Human PSD95 PDZ3 (AA 321 - 394)       | 71658825 | DLG4_HUMAN  | Disks large homolog 4 (Postsynaptic density protein 95) (PSD-95)             |
| Human GRIP1 PDZ1 (AA 62 - 136)        | 48474711 | GRIP1_HUMAN | Glutamate receptor-interacting protein 1 (GRIP1 protein)                     |
| Human GRIP1 PDZ2 (AA 160 - 238)       | 48474711 | GRIP1_HUMAN | Glutamate receptor-interacting protein 1 (GRIP1 protein)                     |
| Human GRIP1 PDZ3 (AA 261 - 336)       | 48474711 | GRIP1_HUMAN | Glutamate receptor-interacting protein 1 (GRIP1 protein)                     |
| Human GRIP1 PDZ4 (AA 481 - 561)       | 48474711 | GRIP1_HUMAN | Glutamate receptor-interacting protein 1 (GRIP1 protein)                     |
| Human GRIP1 PDZ5 (AA 582 - 658)       | 48474711 | GRIP1_HUMAN | Glutamate receptor-interacting protein 1 (GRIP1 protein)                     |
| Human GRIP1 PDZ6 (AA 681 - 755)       | 48474711 | GRIP1_HUMAN | Glutamate receptor-interacting protein 1 (GRIP1 protein)                     |
| Human GRIP1 PDZ7 (AA 1014 - 1086)     | 48474711 | GRIP1_HUMAN | Glutamate receptor-interacting protein 1 (GRIP1 protein)                     |
| Human GRIP2 PDZ1 (AA 57 - 131)        | 48474948 | GRIP2_HUMAN | Glutamate receptor-interacting protein 2 (GRIP2 protein)                     |
| Human GRIP2 PDZ2 (AA 156 - 234)       | 48474948 | GRIP2_HUMAN | Glutamate receptor-interacting protein 2 (GRIP2 protein)                     |
| Human GRIP2 PDZ3 (AA 257 - 332)       | 48474948 | GRIP2_HUMAN | Glutamate receptor-interacting protein 2 (GRIP2 protein)                     |
| Human GRIP2 PDZ4 (AA 465 - 545)       | 48474948 | GRIP2_HUMAN | Glutamate receptor-interacting protein 2 (GRIP2 protein)                     |
| Human GRIP2 PDZ5 (AA 566 - 641)       | 48474948 | GRIP2_HUMAN | Glutamate receptor-interacting protein 2 (GRIP2 protein)                     |
| Human GRIP2 PDZ6 (AA 664 - 738)       | 48474948 | GRIP2_HUMAN | Glutamate receptor-interacting protein 2 (GRIP2 protein)                     |
| Human GRIP2 PDZ7 (AA 951 - 1023)      | 48474948 | GRIP2_HUMAN | Glutamate receptor-interacting protein 2 (GRIP2 protein)                     |
| Human Shank1 PDZ (AA 672 - 761)       | 22001988 | SHAN1_HUMAN | SH3 and multiple ankyrin repeat domains protein 1 (Shank1)                   |
| Human Shank2 PDZ (AA 46 - 131)        | 22001987 | SHAN2_HUMAN | SH3 and multiple ankyrin repeat domains protein 2 (Shank2)                   |
| Human Lin7A PDZ (AA 116 - 190)        | 59798442 | LIN7A_HUMAN | LIN-7 homolog A (LIN-7A) (hLin-7) (Mammalian LIN-seven protein 1)            |
| Human Lin7B PDZ (AA 101 - 175)        | 59798472 | LIN7B_HUMAN | LIN-7 homolog B (LIN-7B) (hLin7B) (Mammalian LIN-seven protein 2) (MALS-2)   |
| Human Lin7C PDZ (AA 101 - 175)        | 59798474 | LIN7C_HUMAN | LIN-7 homolog C (LIN-7C) (Mammalian LIN-seven protein 3) (MALS-3)            |
| Human Erbin PDZ (AA 1330 - 1410)      | 50401131 | LAP2_HUMAN  | LAP2 protein (ErbB2-interacting protein) (Erbin) (Densin-180-like protein)   |
| Human Densin_180 PDZ (AA 1455 - 1535) | 50401129 | LRRC7_HUMAN | Leucine-rich repeat-containing protein 7 (LAP1 protein) (Densin-180)         |
| Human PICK1 PDZ (AA 31 - 105)         | 22095990 | PICK1_HUMAN | PRKCA-binding protein (Protein interacting with C kinase 1)                  |
| Human CASK PDZ (AA 499 - 571)         | 27735175 | CSKP_HUMAN  | Peripheral plasma membrane protein CASK (hCASK)                              |
| Human Magi1 PDZ1 (AA 26 - 105)        | 52782748 | MAGI1_HUMAN | Membrane-associated guanylate kinase, WW and PDZ domain-containing protein 1 |
| Human Magi1 PDZ2 (AA 480 - 556)       | 52782748 | MAGI1_HUMAN | Membrane-associated guanylate kinase, WW and PDZ domain-containing protein 1 |
| Human Magi1 PDZ3 (AA 651 - 753)       | 52782748 | MAGI1_HUMAN | Membrane-associated guanylate kinase, WW and PDZ domain-containing protein 1 |
| Human Magi1 PDZ4 (AA 849 - 925)       | 52782748 | MAGI1_HUMAN | Membrane-associated guanylate kinase, WW and PDZ domain-containing protein 1 |
| Human Magi1 PDZ5 (AA 1007 - 1094)     | 52782748 | MAGI1_HUMAN | Membrane-associated guanylate kinase, WW and PDZ domain-containing protein 1 |
| Human Magi1 PDZ6 (AA 1160 - 1234)     | 52782748 | MAGI1_HUMAN | Membrane-associated guanylate kinase, WW and PDZ domain-containing protein 1 |
| Human Magi2 PDZ1 (AA 26 - 101)        | 88909269 | MAGI2_HUMAN | Membrane-associated guanylate kinase, WW and PDZ domain-containing protein 2 |
| Human Magi2 PDZ2 (AA 434 - 510)       | 88909269 | MAGI2_HUMAN | Membrane-associated guanylate kinase, WW and PDZ domain-containing protein 2 |

|                                        |          |             |                                                                                |
|----------------------------------------|----------|-------------|--------------------------------------------------------------------------------|
| Human Magi2 PDZ3 (AA 613 - 683)        | 88909269 | MAGI2_HUMAN | Membrane-associated guanylate kinase, WW and PDZ domain-containing protein 2   |
| Human Magi2 PDZ4 (AA 786 - 862)        | 88909269 | MAGI2_HUMAN | Membrane-associated guanylate kinase, WW and PDZ domain-containing protein 2   |
| Human Magi2 PDZ5 (AA 929 - 1010)       | 88909269 | MAGI2_HUMAN | Membrane-associated guanylate kinase, WW and PDZ domain-containing protein 2   |
| Human Magi2 PDZ6 (AA 1155 - 1229)      | 88909269 | MAGI2_HUMAN | Membrane-associated guanylate kinase, WW and PDZ domain-containing protein 2   |
| Human Magi3 PDZ1 (AA 27 - 106)         | 27544925 | N.A.        | membrane-associated guanylate kinase-related 3 isoform 1                       |
| Human Magi3 PDZ2 (AA 443 - 519)        | 27544925 | N.A.        | membrane-associated guanylate kinase-related 3 isoform 1                       |
| Human Magi3 PDZ3 (AA 611 - 681)        | 27544925 | N.A.        | membrane-associated guanylate kinase-related 3 isoform 1                       |
| Human Magi3 PDZ4 (AA 759 - 835)        | 27544925 | N.A.        | membrane-associated guanylate kinase-related 3 isoform 1                       |
| Human Magi3 PDZ5 (AA 885 - 963)        | 27544925 | N.A.        | membrane-associated guanylate kinase-related 3 isoform 1                       |
| Human Magi3 PDZ6 (AA 1054 - 1128)      | 27544925 | N.A.        | membrane-associated guanylate kinase-related 3 isoform 1                       |
| <b>Human Mint1 PDZ1 (AA 665 - 743)</b> | 6226838  | APBA1_HUMAN | Amyloid beta A4 precursor protein-binding family A member 1 (Mint-1)           |
| <b>Human Mint1 PDZ2 (AA 757 - 823)</b> | 6226838  | APBA1_HUMAN | Amyloid beta A4 precursor protein-binding family A member 1 (Mint-1)           |
| Human Mint2 PDZ1 (AA 577 - 655)        | 6226950  | APBA2_HUMAN | Amyloid beta A4 precursor protein-binding family A member 2 (Mint-2)           |
| Human Mint2 PDZ2 (AA 669 - 735)        | 6226950  | APBA2_HUMAN | Amyloid beta A4 precursor protein-binding family A member 2 (Mint-2)           |
| Human Mint3 PDZ1 (AA 403 - 481)        | 6226953  | APBA3_HUMAN | Amyloid beta A4 precursor protein-binding family A member 3 (Mint-3)           |
| Human Mint3 PDZ2 (AA 495 - 561)        | 6226953  | APBA3_HUMAN | Amyloid beta A4 precursor protein-binding family A member 3 (Mint-3)           |
| Human nNOS PDZ (AA 26 - 100)           | 1709333  | NOS1_HUMAN  | Nitric-oxide synthase, brain (NOS type I) (Neuronal NOS) (N-NOS) (nNOS)        |
| Human LIMK1 PDZ (AA 176 - 258)         | 90185240 | LIMK1_HUMAN | LIM domain kinase 1 (LIMK-1)                                                   |
| Human LIMK2 PDZ (AA 161 - 239)         | 1708824  | LIMK2_HUMAN | LIM domain kinase 2 (LIMK-2)                                                   |
| Human Tamalin 1 PDZ (AA 110 - 190)     | 74738818 | GRASP_HUMAN | Tamalin - General receptor for phosphoinositides 1-associated scaffold protein |
