# Supplementary material for: A Post-Synaptic Scaffold at the Origin of the Animal Kingdom
Source: PubMed Central journal article supplement (PMC1876816; doi:10.1371/journal.pone.0000506), 2007-06-06
Supplement: pone.0000506.s008.pdf [file pone.0000506.s008.pdf]

|               | <b>Sponge<br/><i>dlg</i></b> | Spanning Domains  | <b>Human<br/>SAP97</b> | Spanning Domains |
|---------------|------------------------------|-------------------|------------------------|------------------|
| exon1         |                              |                   | 159                    |                  |
| exon2         | 39                           |                   | 50                     |                  |
| <b>exon3</b>  | <b>135</b>                   | <b>L27</b>        | <b>132</b>             | <b>L27</b>       |
| <b>exon4</b>  | <b>165</b>                   | <b>L27 + gap</b>  | <b>167</b>             | <b>L27 + gap</b> |
| exon5         |                              |                   | 165                    |                  |
| exon6         | 32                           |                   | 99                     |                  |
| exon7         | 39                           |                   | 54                     |                  |
| exon8         | 34                           |                   | 51                     |                  |
| <b>exon9</b>  | <b>128</b>                   | <b>PDZ1</b>       | <b>125</b>             | <b>PDZ1</b>      |
| exon10        | 102                          | PDZ1              | 170                    | PDZ1             |
| exon11        | 203                          | PDZ1 + gap + PDZ2 | 137                    | PDZ2             |
| exon12        | 245                          | PDZ2              | 145                    | PDZ2             |
| exon13        | 213                          | gap + PDZ3        | 121                    | gap              |
| exon14        |                              |                   | 157                    | PDZ3             |
| <b>exon15</b> | <b>102</b>                   | <b>PDZ3</b>       | <b>103</b>             | <b>PDZ3</b>      |
| exon16        | 68                           |                   | 115                    |                  |
| <b>exon17</b> | <b>176</b>                   | <b>SH3</b>        | <b>177</b>             | <b>SH3</b>       |
| <b>exon18</b> | <b>64</b>                    |                   | <b>67</b>              |                  |
| exon19        | 124                          |                   | 100                    |                  |
| exon20        | 46                           |                   | 42                     |                  |
| exon21        |                              |                   | 51                     |                  |
| <b>exon22</b> | <b>101</b>                   |                   | <b>102</b>             |                  |
| <b>exon23</b> | <b>173</b>                   | <b>GK</b>         | <b>173</b>             | <b>GK</b>        |
| <b>exon24</b> | <b>112</b>                   | <b>GK</b>         | <b>110</b>             | <b>GK</b>        |
| <b>exon25</b> | <b>90</b>                    | <b>GK</b>         | <b>92</b>              | <b>GK</b>        |
| <b>exon26</b> | <b>107</b>                   |                   | <b>107</b>             |                  |
