# Supplementary material for: A Post-Synaptic Scaffold at the Origin of the Animal Kingdom
Source: PubMed Central journal article supplement (PMC1876816; doi:10.1371/journal.pone.0000506), 2007-06-06
Supplement: pone.0000506.s009.pdf [file pone.0000506.s009.pdf]

|                   | Human | Fly | Nema | Sponge | Yeast | Dicty | Plants |
|-------------------|-------|-----|------|--------|-------|-------|--------|
| PKC               | YES   | YES | YES  | YES    | YES   | YES   | YES    |
| PMCA              | YES   | YES | YES  | YES    | YES   | YES   | YES    |
| CRIP1             | YES   | YES | YES  | YES    | NO    | NO    | YES    |
| iGluR             | YES   | YES | YES  | NO     | NO    | NO    | YES    |
| mGluR             | YES   | YES | YES  | YES    | NO    | NO    | NO     |
| GABABR            | YES   | YES | YES  | YES    | NO    | YES   | NO     |
| K+ Kir Channel    | YES   | YES | YES  | YES    | NO    | NO    | NO     |
| K+ Shaker         | YES   | YES | YES  | NO     | NO    | NO    | NO     |
| Neurologin        | YES   | YES | YES  | NO     | NO    | NO    | NO     |
| C. Cadherin       | YES   | YES | YES  | YES    | NO    | NO    | NO     |
| Homer             | YES   | YES | YES  | YES    | NO    | NO    | NO     |
| NOS               | YES   | YES | YES  | YES    | NO    | NO    | NO     |
| IP3R              | YES   | YES | YES  | YES    | NO    | NO    | NO     |
| Stargazin         | YES   | YES | NO   | NO     | NO    | NO    | NO     |
| GKAP/DLG7         | YES   | YES | YES  | YES    | NO    | NO    | NO     |
| Cortactin         | YES   | YES | YES  | YES    | NO    | NO    | NO     |
| SPAR              | YES   | YES | YES  | YES    | NO    | NO    | NO     |
| SynGAP            | YES   | YES | YES  | YES    | NO    | NO    | NO     |
| Citron            | YES   | YES | YES  | YES    | NO    | NO    | NO     |
| $\delta$ -Catenin | YES   | YES | YES  | YES    | NO    | NO    | NO     |
| $\beta$ -Catenin  | YES   | YES | YES  | YES    | NO    | NO    | NO     |
| $\alpha$ -Catenin | YES   | YES | YES  | YES    | NO    | NO    | NO     |
| CaMKII            | YES   | YES | YES  | YES    | NO    | NO    | NO     |
| DLG               | YES   | YES | YES  | YES    | NO    | NO    | NO     |
| CASK              | YES   | YES | YES  | NO     | NO    | NO    | NO     |
| PICK1             | YES   | YES | YES  | YES    | NO    | NO    | NO     |
| Mint (LIN-10)     | YES   | YES | YES  | YES    | NO    | NO    | NO     |
| LIN-7 (Veli)      | YES   | YES | YES  | YES    | NO    | NO    | NO     |
| LimK              | YES   | YES | NO   | NO     | NO    | NO    | NO     |
| Erbin             | YES   | YES | YES  | NO     | NO    | NO    | NO     |
| Tamalin           | YES   | YES | YES  | YES    | NO    | NO    | NO     |
| GRIP              | YES   | YES | NO   | YES    | NO    | NO    | NO     |
| Shank             | YES   | YES | YES  | YES    | NO    | NO    | NO     |
| MAGI              | YES   | YES | YES  | YES    | NO    | NO    | NO     |
| Ephrin Receptor   | YES   | YES | YES  | YES    | NO    | NO    | NO     |
| ErbB Receptor     | YES   | YES | YES  | YES    | NO    | NO    | NO     |
